# Supplementary material for: Porous carbon spheres as a functional conducting framework for use in lithium–sulfur batteries
Source: Royal Society of Chemistry journal article supplement (doi:10.1039/c3ra41061g), 2013-01-01
Supplement: c3ra41061g.pdf [file c3ra41061g.pdf]

## Supporting Information

### Porous Carbon Sphere as a Functional Conducting Framework for Use in Lithium-Sulfur Batteries

Min-Sik Park,<sup>a,\*</sup> Ji-Sang Yu,<sup>a</sup> Ki Jae Kim,<sup>a</sup> Goojin Jeong,<sup>a</sup> Jae-Hun Kim,<sup>a,b</sup> Taeun Yim,<sup>a</sup> Yong-Nam Jo,<sup>a</sup> Uk Hwang,<sup>a</sup> Shin Kang,<sup>c</sup> Taewoo Woo,<sup>c</sup> Hansu Kim,<sup>d</sup> and Young-Jun Kim<sup>a,\*</sup>

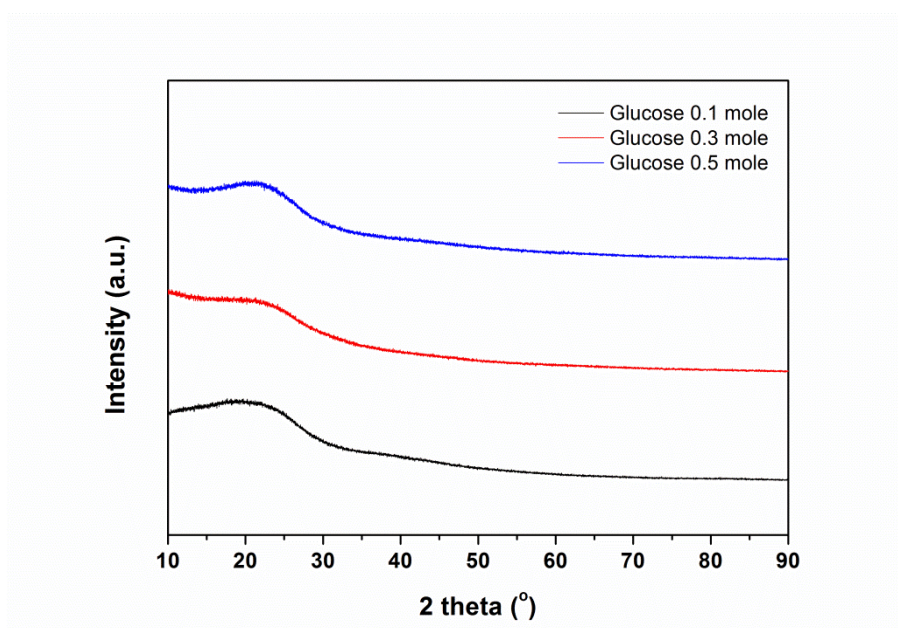

**Fig. S1** Powder X-ray diffraction (XRD) patterns for CS synthesized by a hydrothermal method using glucose solutions with different concentrations (0.1 mole / 0.3 mole / 0.5 mole).

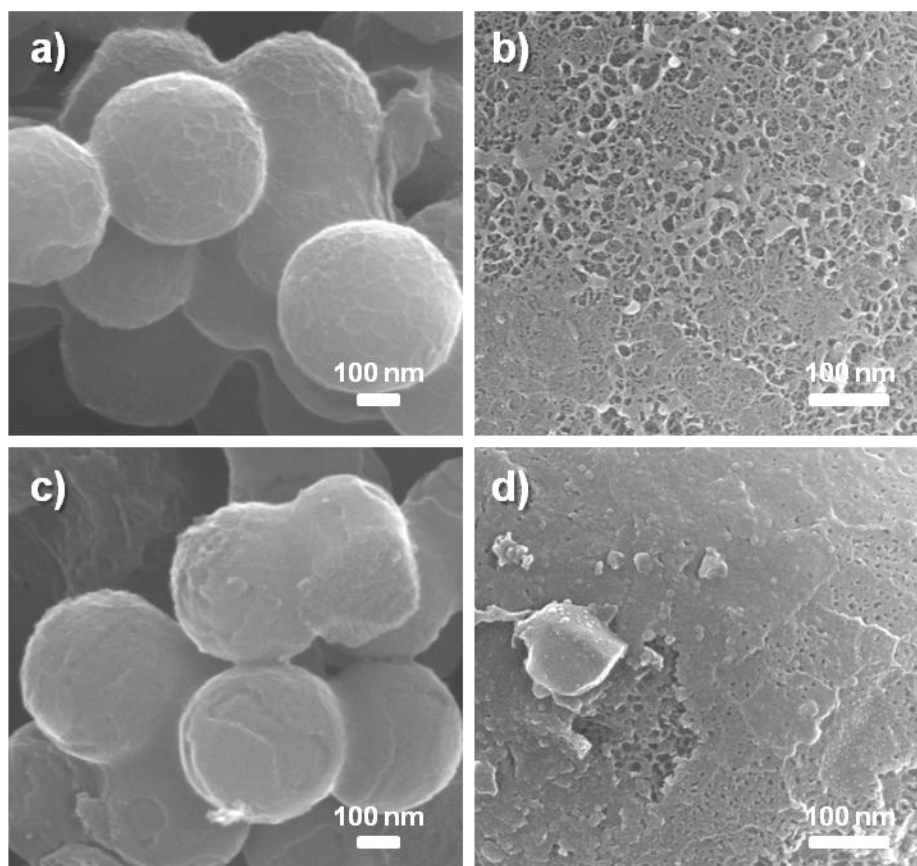

**Fig. S2** FESEM images of porous CS and S-infiltrated CS at different magnifications; (a–b) porous CS and (c–d) S-infiltrated CS.

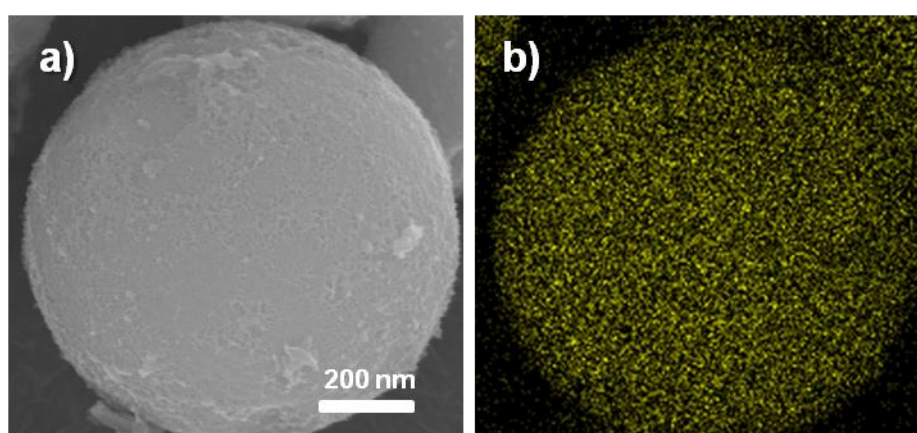

**Fig. S3** Element mapping result for S-infiltrated CS; (a) FESEM image and (b) S K $\alpha$  mapping result.

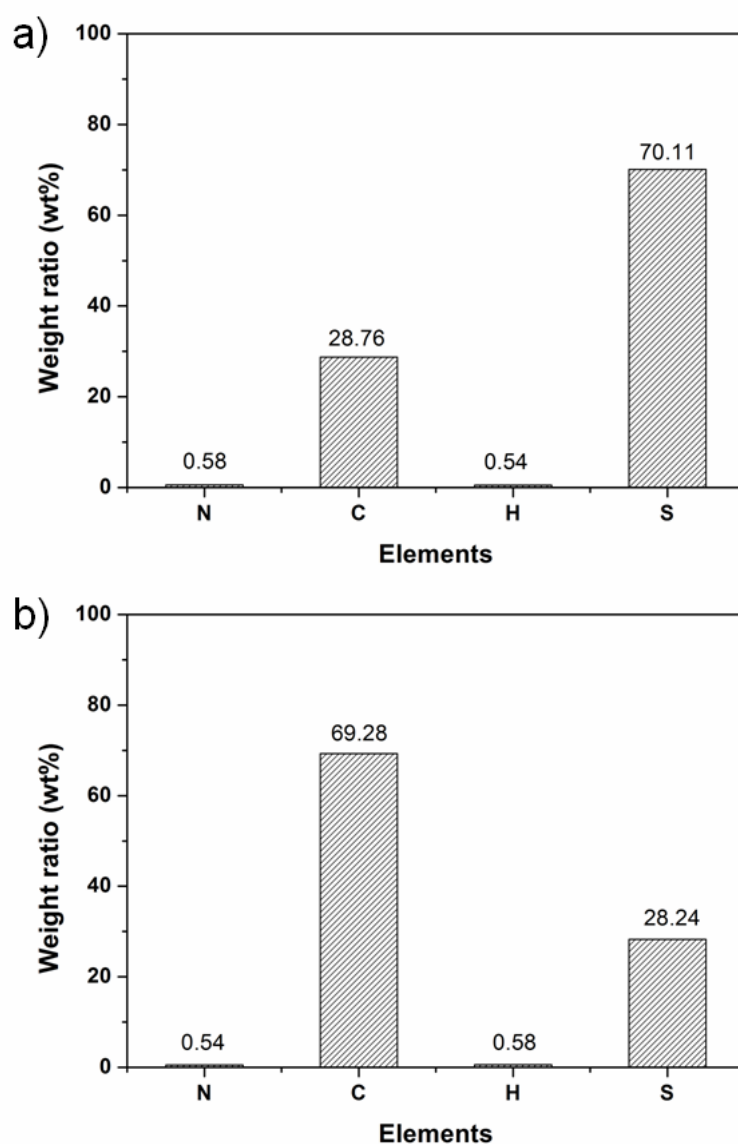

**Fig. S4** The elemental composition of S-infiltrated CS (a) before CS<sub>2</sub> washing and (b) after CS<sub>2</sub> washing for removal residual S on the surface of CS. S-infiltrated CS was carefully washed using dilute CS<sub>2</sub> solution.

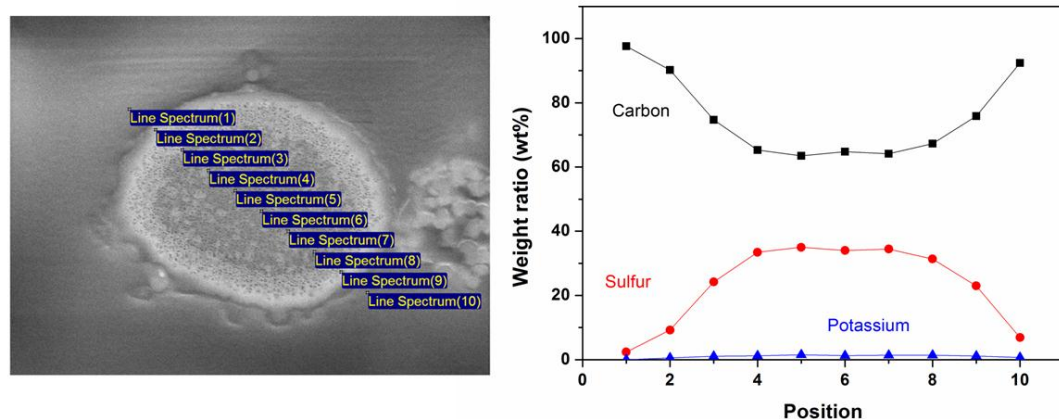

**Fig. S5** Cross-sectional image of S-infiltrated CS after CS<sub>2</sub> washing for removal residual S on the surface of CS combined with energy dispersive spectrometer (EDS) results.

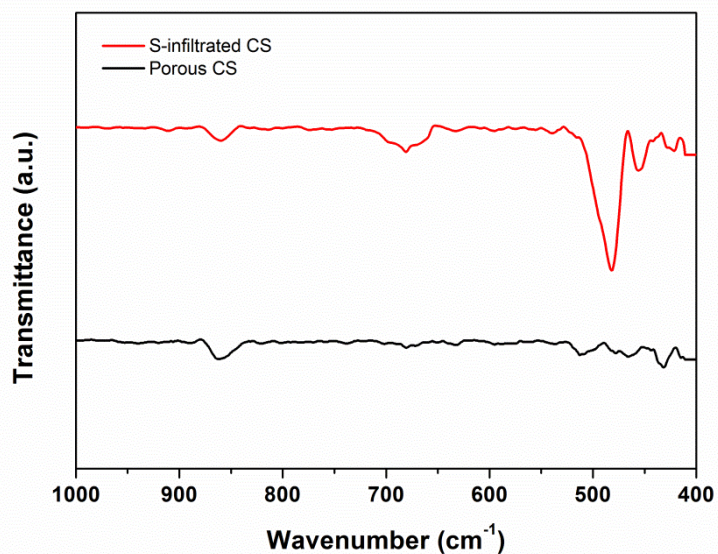

**Fig. S6** A comparison of FT-IR profiles for porous CS and S-infiltrated CS.

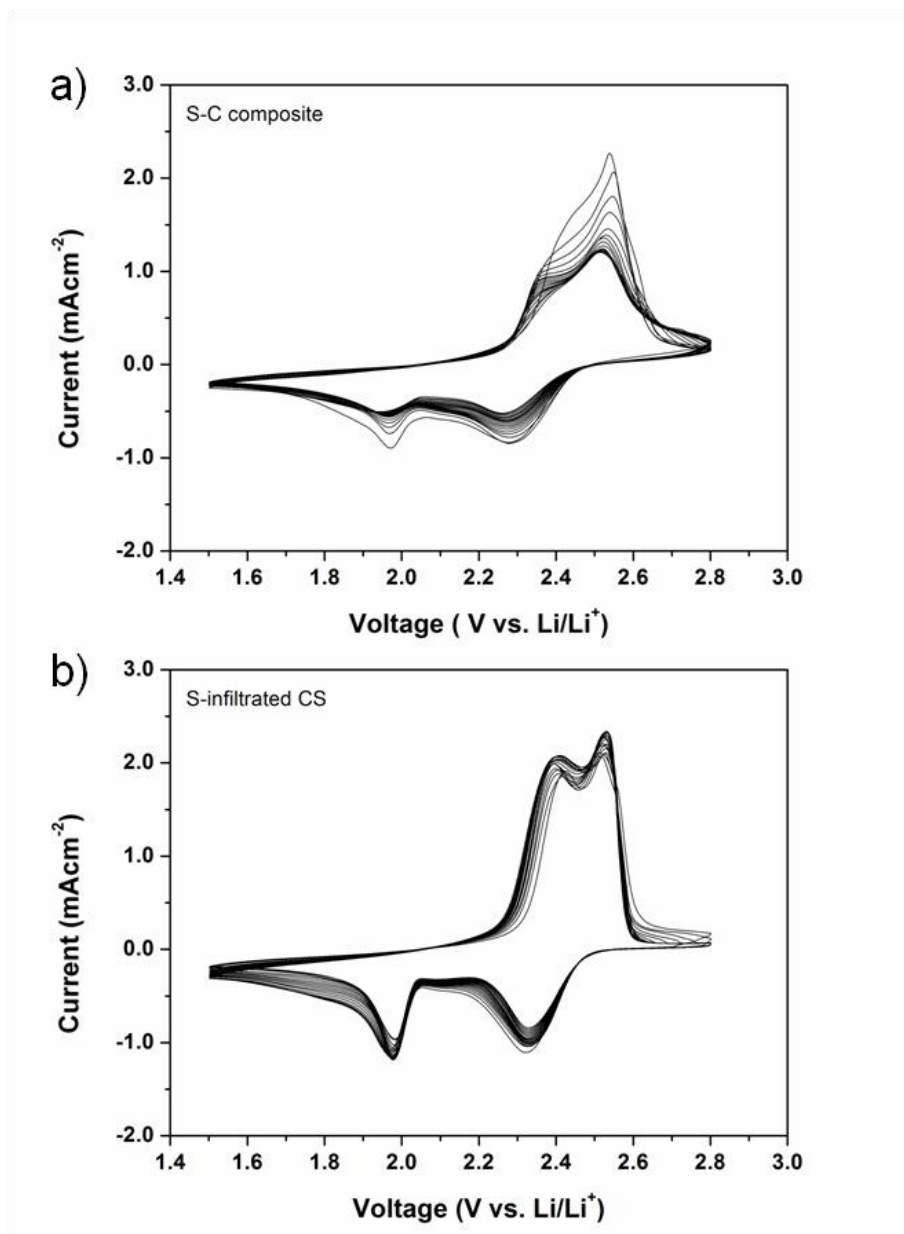

**Fig. S7** Cyclic voltammograms of (a) S-C composite and (b) S-infiltrated CS during 20 cycles at a scan rate of 0.1 mVs<sup>-1</sup> in a voltage range of 1.5 to 2.8 V vs. Li/Li<sup>+</sup>.

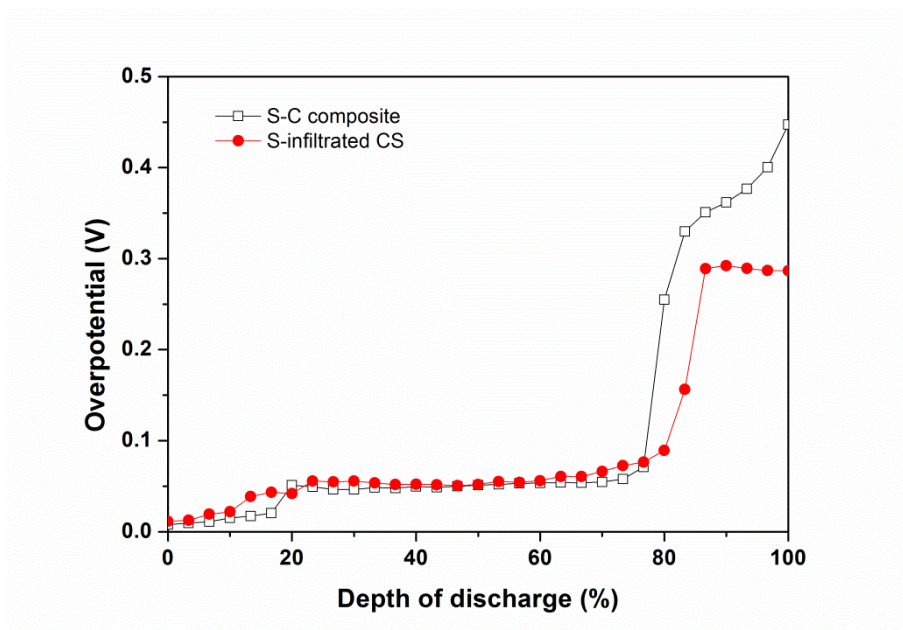

**Fig. S8** The variations of overpotential obtained from S-infiltrated CS and S–C composite during the first discharge.

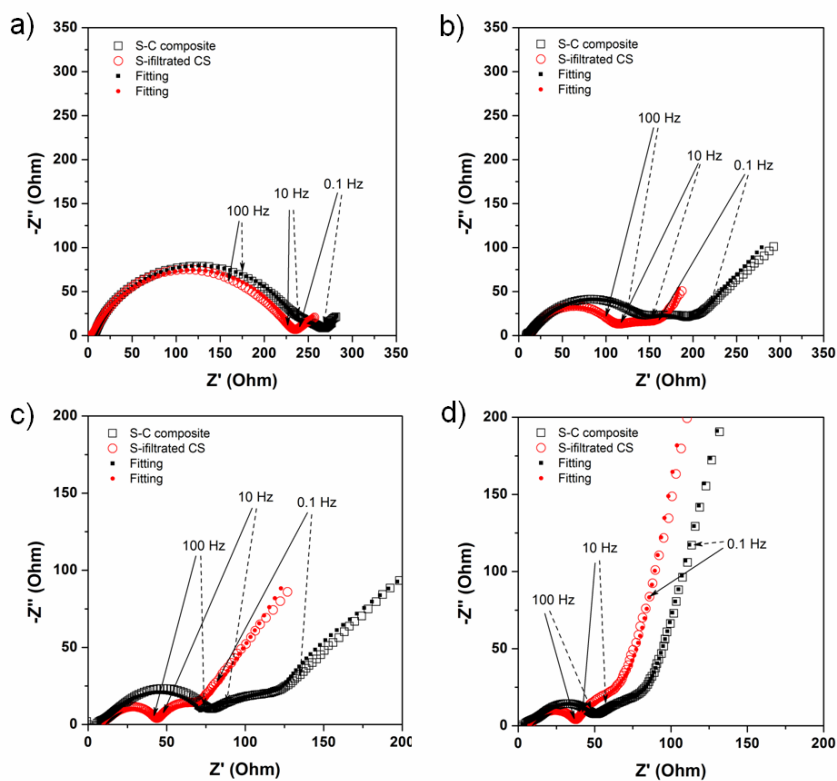

**Fig. S9** Impedance spectra of S-infiltrated CS and S–C composite obtained from different depth of discharge; (a) 6.6%, (b) DOD 29.7%, (c) DOD 59.4%, and (d) DOD 89.1%. All components are carefully fitted with the depth of discharge.

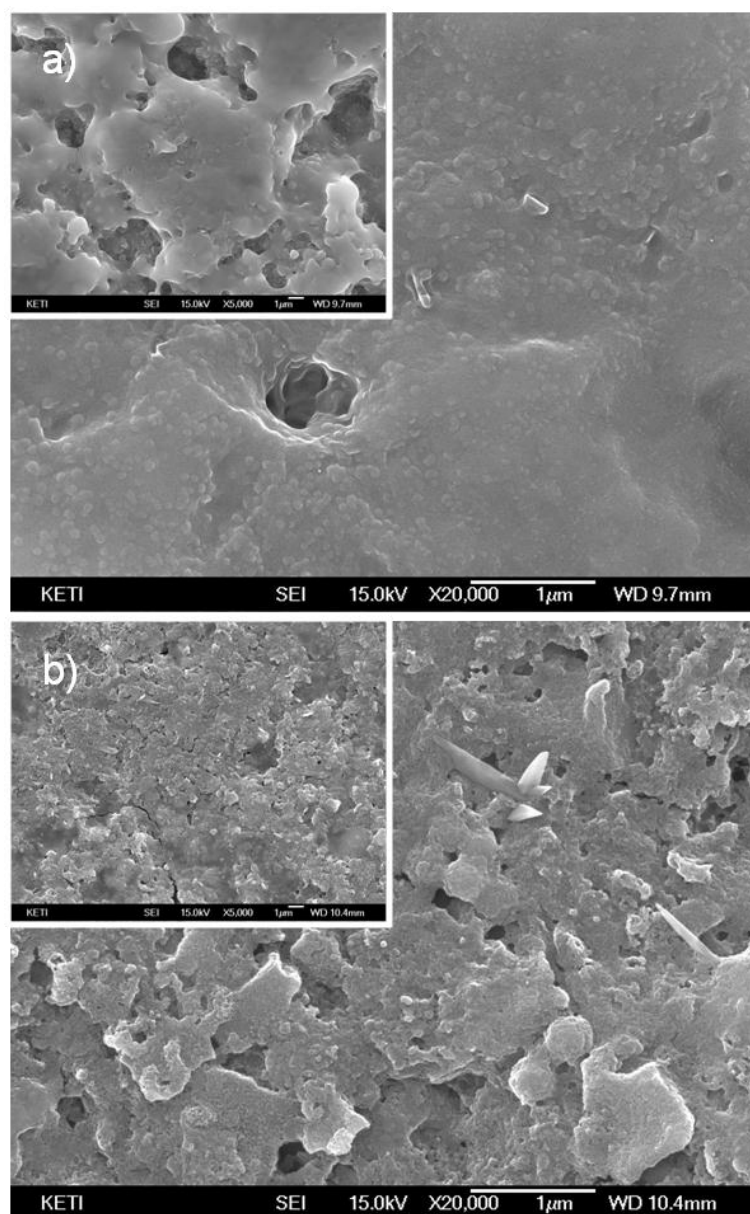

**Fig. 10** FESEM images of (a) S-C composite cathode and (b) S-infiltrated CS cathode at different magnifications after 50 cycles.
